# Supplementary material for: The Effect of Silver Nanoparticles/Titanium Dioxide in Poly(acrylic acid-co-acrylamide)-Modified, Deproteinized, Natural Rubber Composites on Dye Removal
Source: MDPI journal article supplement (doi:10.3390/polym16010092), 2023-12-28
Supplement: s1 [file s1]

# Supplementary Materials: The Effect of Silver Nanoparticles/Titanium Dioxide in Poly(acrylic acid-co-acrylamide)-Modified, Deproteinized, Natural Rubber Composites on Dye Removal

Supharat Inphonlek, Chaiwat Ruksakulpiwat and Yupaporn Ruksakulpiwat

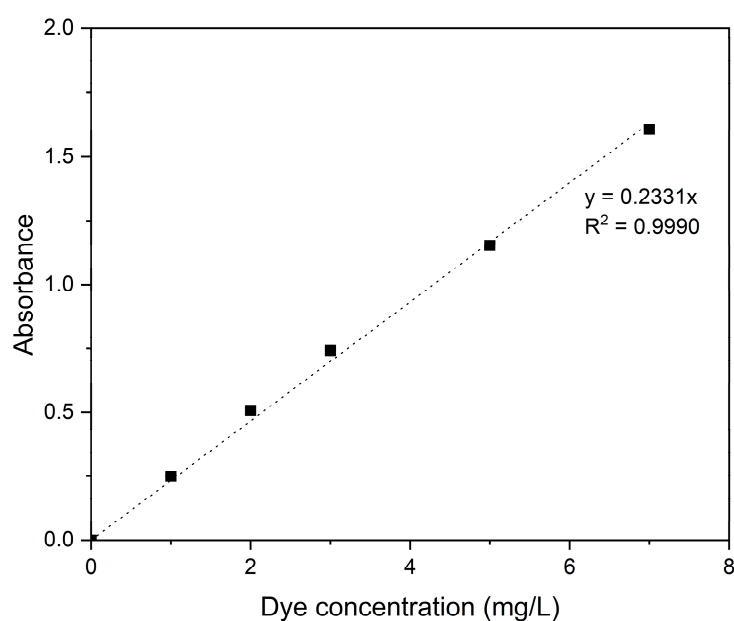

Figure S1. Calibration curve of MB solution.

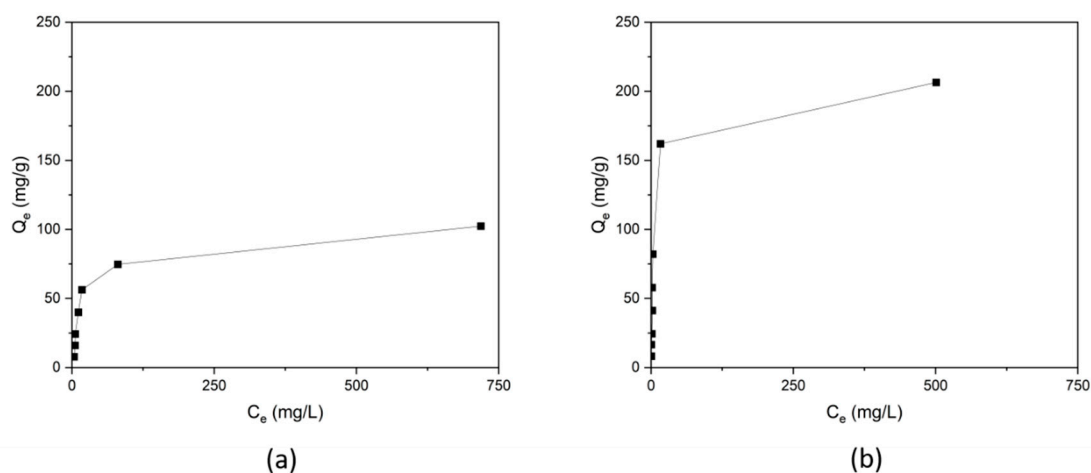

Figure S2. Equilibrium adsorption capacity as a function of equilibrium dye concentration of (a) N7, and (b) N7/Ag-Ti5.0.
